# Supplementary material for: A label-free strategy for visual genotyping based on phosphate induced coloration reaction
Source: Royal Society of Chemistry journal article supplement (doi:10.1039/d2ra03989c), 2022-01-01
Supplement: d2ra03989c1.pdf [file d2ra03989c1.pdf]

## A label-free strategy for visual genotyping based on phosphate induced coloration reaction

Jiaying Zhang,<sup>‡a</sup> Hui Hui,<sup>‡c</sup> Wei Xu,<sup>a</sup> Kai Hua,<sup>a</sup> Yali Cui,<sup>\*a</sup> Xiaonan Liu,<sup>\*a</sup>

<sup>a</sup> College of Life Sciences, Northwest University, Xi'an, 710069, China.

<sup>b</sup> Department of Immunology, The Fourth Military Medical University, Xi'an, 710032, China.

<sup>c</sup> Shanxi Provincial Cancer Hospital, Xi'an, 710061, China.

\* Corresponding Authors.

E-mail addresses: yalicui@nwu.edu.cn (Yali Cui), xiaonanliuvip@163.com (Xiaonan Liu).

<sup>‡</sup> Contributed equally.

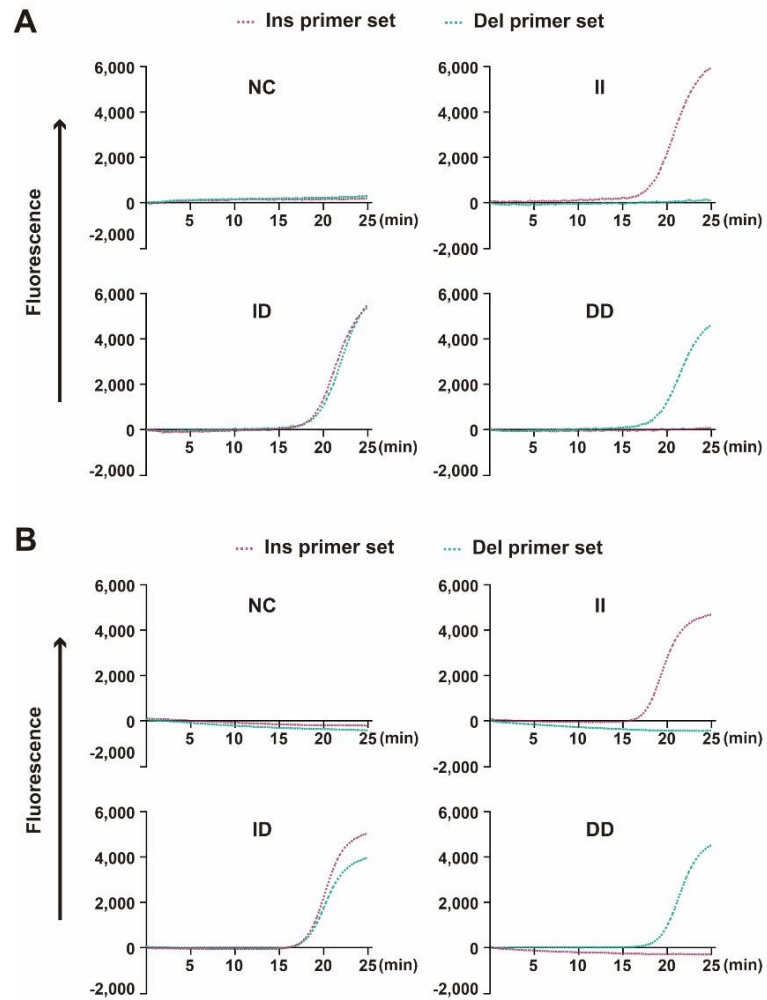

**Fig. S1.** The amplification kinetics curves of *ACE* indels genotyping with (A) genomic DNA and (B) whole blood respectively.

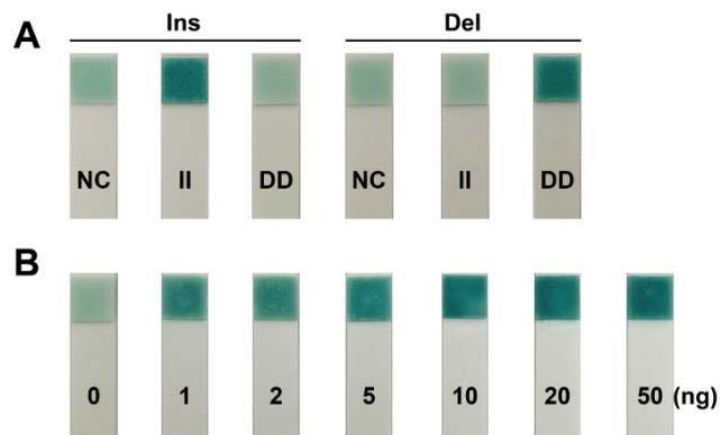

**Fig. S2.** The response signal with (A) different combinations of primer set and variant and (B)

different concentrations of genome DNA.

**Table. S1.** Primer sequences

| Primer  | Sequence (5'-3')                                    |
|---------|-----------------------------------------------------|
| F(PCR)  | AGGAGAGGAGAGAGACTCAAGCAC                            |
| R(PCR)  | GGACCCAAGTGCCAGTGATG                                |
| FIP-Ins | GTATCACGCCTGTAATCCCAGCACT-CCGGCTAATTTTTTGTATTTTTAGT |
| FIP-Del | CCACATAAAAGTGACTGTATAGGCAGCAG-AGGCCGGGGACTCTGTAAG   |
| BIP-Ins | TTTCGCCAATTTTATTCCAGCTCTG-CTCCAGCCCTTAGCTCACCT      |
| BIP-Del | TTTCGCCAATTTTATTCCAGCTCTG-CTCCAGCCCTTAGCTCACCT      |
| LF-Ins  | AAACGGTGAAACCCCGTCT                                 |
| LF-Del  | AAATGGGAGAAAGGATGGGA                                |
| LB-Ins  | CTCTGAGCTCCCCTTACAAGC                               |
| LB-Del  | CTCTGAGCTCCCCTTACAAGC                               |
| F3-Ins  | GCTCTGTCGCCCAGGCT                                   |
| F3-Del  | AGGAGAGGAGAGAGACTCAAGCAC                            |
| B3-Ins  | TCAGATCTGGTAGGGGTTTGAAT                             |
| B3-Del  | TCAGATCTGGTAGGGGTTTGAAT                             |

Note: Ins primer set consists of F3-Ins, B3-Ins, LF-Ins, LB-Ins, FIP-Ins and BIP-Ins, Del primer set consists of F3-Del, B3-Del, LF-Del, LB-Del, FIP-Del and BIP-Del.

**Table S2.** Chromatic difference between the positive and negative results

|              | Negative 1-Positive 1 | Negative 2-Positive 2 | Negative 3-Positive 3 | Average |
|--------------|-----------------------|-----------------------|-----------------------|---------|
| $\Delta E^*$ | 17.7                  | 15.43                 | 15.7                  | 16.28   |

Note:  $\Delta E^*$  value greater than 6 indicates that chromatic difference can be distinguished by the human eye;  $\Delta E E^* = \sqrt{(\Delta L L^*)^2 + (\Delta a a^*)^2 + (\Delta b b^*)^2}$

**Table S3.** Genotyping results of *ACE* indels

| Phosphate induced coloration reaction | PCR-based electrophoresis |    |    | Total | Discrepant | Agreement |
|---------------------------------------|---------------------------|----|----|-------|------------|-----------|
|                                       | II                        | ID | DD |       |            |           |
| II                                    | 10                        | 0  | 0  | 10    | 0          | 100%      |
| ID                                    | 0                         | 10 | 0  | 10    | 0          | 100%      |
| DD                                    | 0                         | 0  | 5  | 5     | 0          | 100%      |
| Total                                 | 10                        | 10 | 5  | 25    | 0          | 100%      |

**The sequences of *ACE* insertion variant**

AGGAGAGGAGAGAGACTCAAGCACGCCCTCACAGGACTGCTGAGGCCCTGCAGGTGTCTGCAGCA  
TGTGGCCCCAGGCCGGGGACTCTGTAAGCCACTGCTGGAGAGCCACTCCCATCCTTTCTCCCATTCT  
CTAGACCTGCTGCCTATACAGTCACTTTTTTTTTTTTGTAGACGGAGTCTCGCTCTGTGCGCCAGGCTG  
GAGTGCAGTGGCGGGATCTCGGCTCACTGCAAGCTCCGCCTCCCGGGTTACGCCATTCTCTGCCTC  
AGCCTCCAAGTAGCTGGGACCACAGGCGCCGCCACTACGCCCGGCTAATTTTTTGTATTTTTAGTAG  
AGACGGGGTTTACCGTTTTAGCCGGGATGGTCTCGATCTCCTGACCTCGTGATCCGCCCGCCTCGGC  
CTCCCAAAGTGCTGGGATTACAGGCGTGATACAGTCACTTTTATGTGGTTTTCGCCAATTTATTCCAGC  
TCTGAAATTCTCTGAGCTCCCCTTACAAGCAGAGGTGAGCTAAGGGCTGGAGCTCAAGGCATTCAAA  
CCCCTACCAGATCTGACGAATGTGATGGCCACGTCCCGGAAATATGAAGACCTGTTATGGGCATGGG  
AGGGCTGGCGAGACAAGGCGGGGAGAGCCATCCTCCAGTTTTACCCGAAATACGTGGAACATCA  
ACCAGGCTGCCCGGCTCAATGGTGAGTCCCTGCTGCCAACATCACTGGCACTTGGGTCC

**The sequences of *ACE* deletion variant**

AGGAGAGGAGAGAGACTCAAGCACGCCCTCACAGGACTGCTGAGGCCCTGCAGGTGTCTGCAGCA  
TGTGGCCCCAGGCCGGGGACTCTGTAAGCCACTGCTGGAGAGCCACTCCCATCCTTTCTCCCATTCT  
CTAGACCTGCTGCCTATACAGTCACTTTTATGTGGTTTTCGCCAATTTTATTCCAGCTCTGAAATTCTCT  
GAGCTCCCCTTACAAGCAGAGGTGAGCTAAGGGCTGGAGCTCAAGGCATTCAAACCCCTACCAGATC  
TGACGAATGTGATGGCCACGTCCCGGAAATATGAAGACCTGTTATGGGCATGGGAGGGCTGGCGAG  
ACAAGGCGGGGAGAGCCATCCTCCAGTTTTACCCGAAATACGTGGAACATCAACCAGGCTGCCCG  
GCTCAATGGTGAGTCCCTGCTGCCAACATCACTGGCACTTGGGTCC
